# Supplementary material for: Diffusion kurtosis imaging can efficiently assess the glioma grade and cellular proliferation
Source: PubMed Central journal article supplement (PMC4747234; doi:10.18632/oncotarget.5675), 2015-11-03
Supplement: oncotarget-06-42380-s001.pdf [file oncotarget-06-42380-s001.pdf]

SUPPLEMENTARY FIGURES AND TABLES

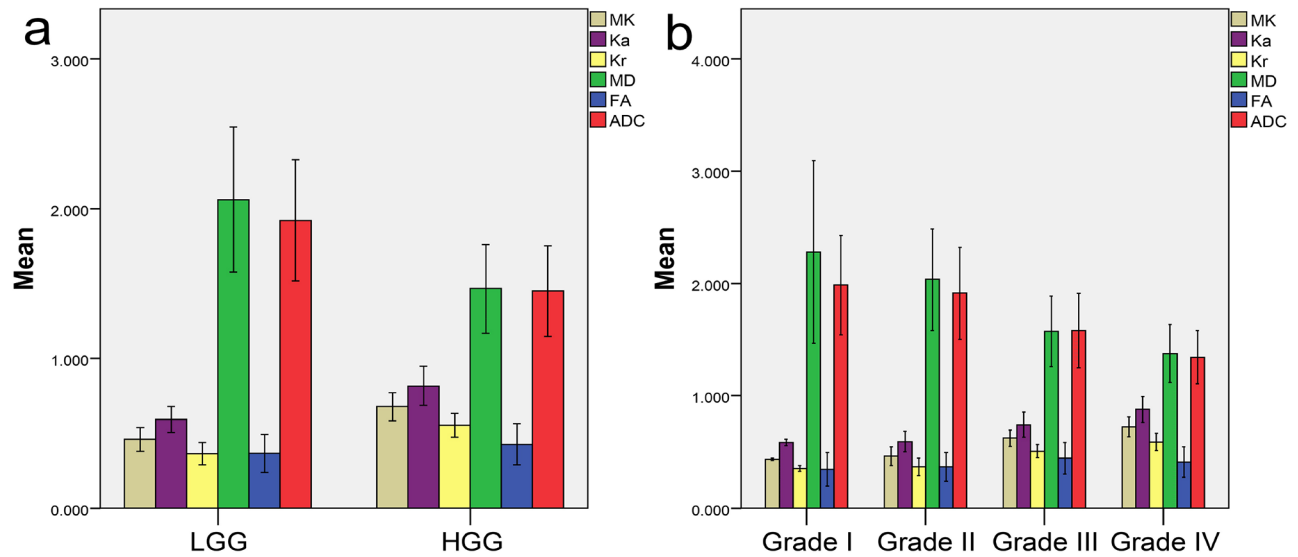

**Supplementary Figure S1: Bar charts of normalized metrics for different grades of astrocytic tumors.** Bar chart of each normalized metric **a.** in HGG and LGG and **b.** in grade I, grade II, grade III and grade IV astrocytic tumors. All metrics are dimensionless, except for MD and ADC, with units of  $10^{-3}$  mm<sup>2</sup>/sec.

MK: mean kurtosis; Ka: axial kurtosis; Kr: radial kurtosis; MD: mean diffusivity; FA: fractional anisotropy; ADC: apparent diffusion coefficient; HGG: high-grade glioma; LGG: low-grade glioma.

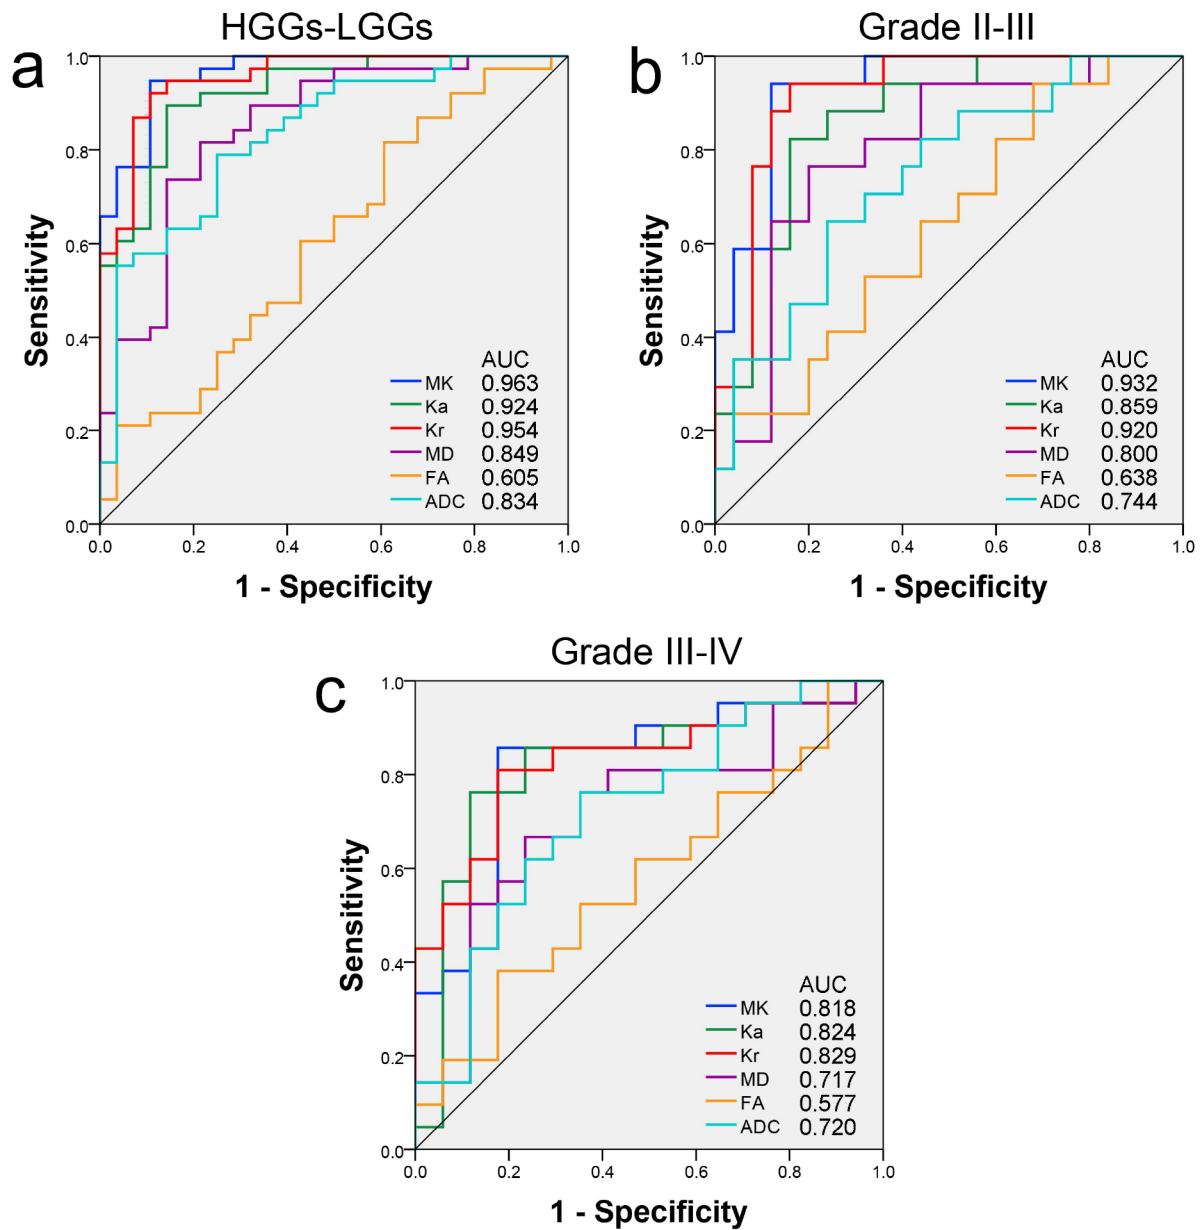

**Supplementary Figure S2: ROC curves for all the metrics in differentiating different grades of astrocytic tumors.** ROC curves and AUCs for all the metrics in the solid region of the tumor for differentiating **a.** between HGGs and LGGs, **b.** between grade II and III and **c.** between grade III and IV astrocytic tumors.

ROC curves: receiver operating characteristic curves; AUC: area under the curve; MK: mean kurtosis; Ka: axial kurtosis; Kr: radial kurtosis; MD: mean diffusivity; FA: fractional anisotropy; ADC: apparent diffusion coefficient; HGGs: high-grade gliomas; LGGs: low-grade gliomas.

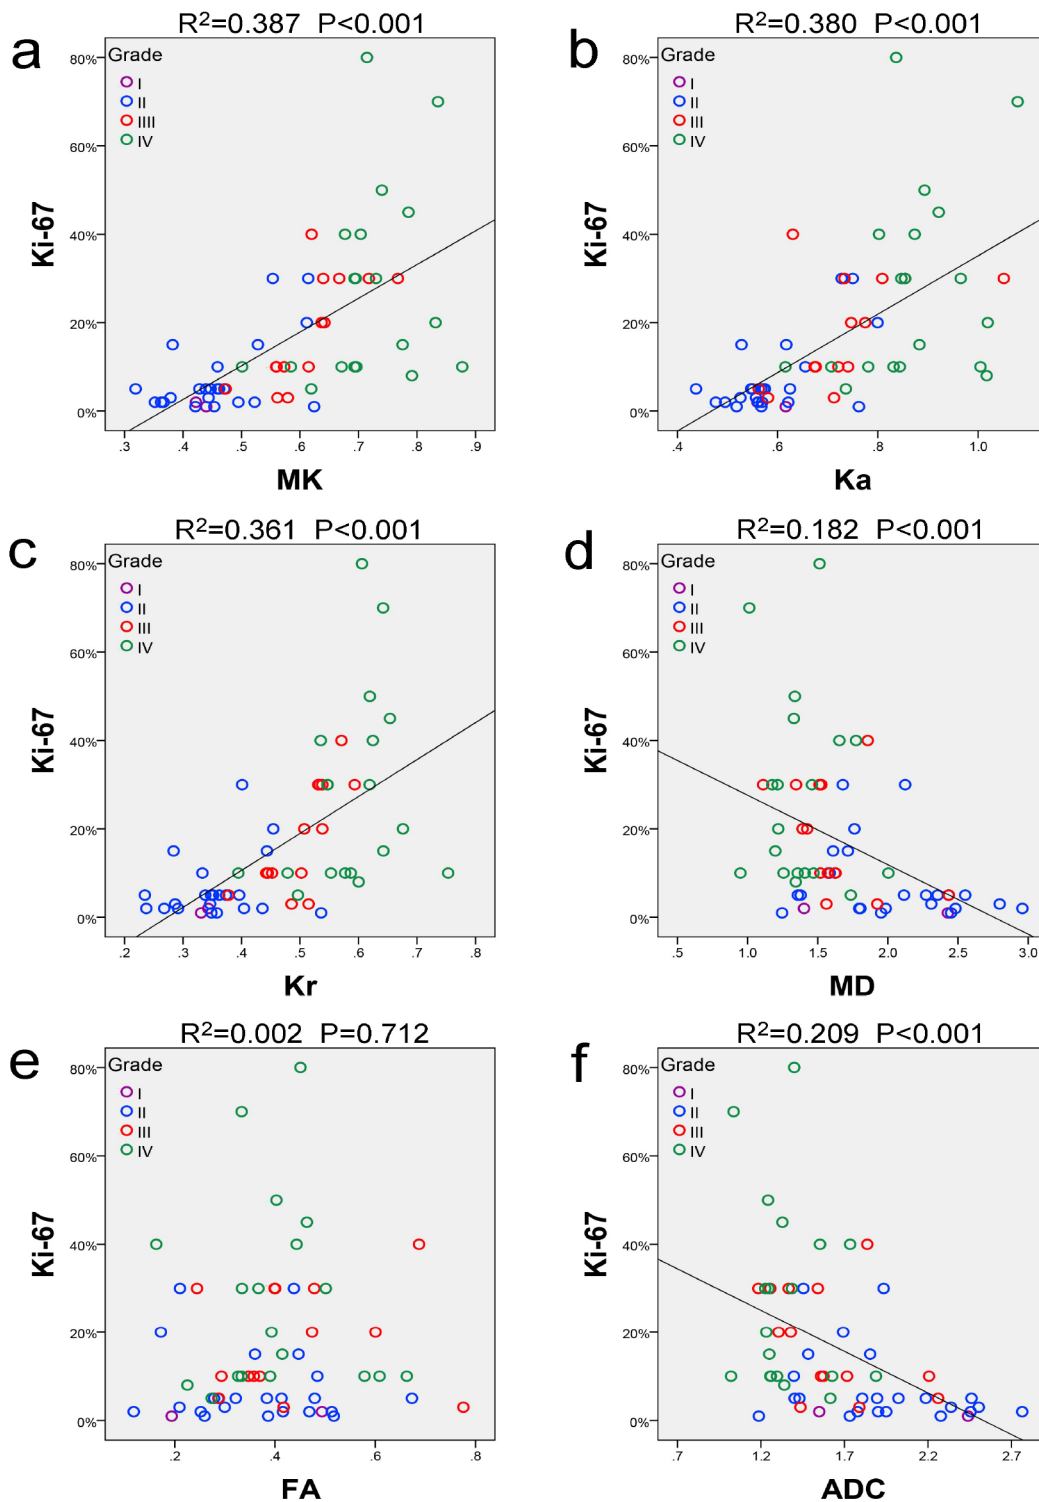

**Supplementary Figure S3: Correlations between Ki-67 and each metric for astrocytic tumors.** Scatter diagrams demonstrating the correlations between Ki-67 labeling index and a. MK, b. Ka, c. Kr, d. MD, e. FA or f. ADC. All metrics are dimensionless, except for MD and ADC, with units of  $10^{-3}$  mm<sup>2</sup>/sec.

MK: mean kurtosis; Ka: axial kurtosis; Kr: radial kurtosis; MD: mean diffusivity; FA: fractional anisotropy; ADC: apparent diffusion coefficient.

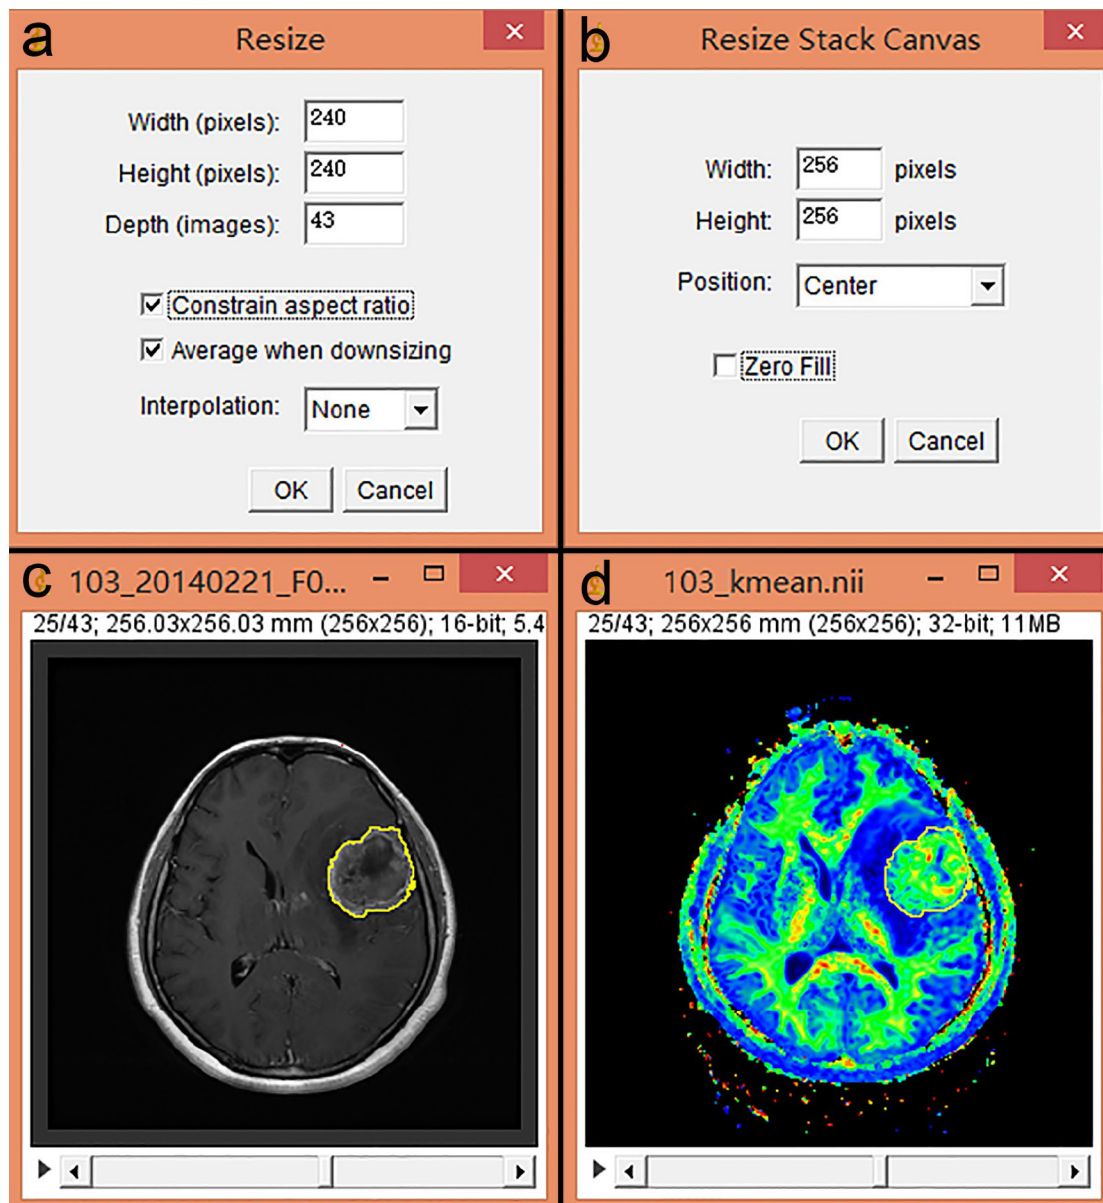

**Supplementary Figure S4: Protocols for changing the resolution, number of slices and FOV of enhanced T1-FLAIR to match between enhanced T1-FLAIR and the DKI metric maps.** The image resolutions ultimately generated by the scanner for enhanced T1-FLAIR and DKI was  $512 \times 512$  and  $256 \times 256$  due to interpolation. Thus, **a.** the image resolution of enhanced T1-FLAIR should first be resized to  $240 \times 240$  (pixels were resized to  $1\text{mm} \times 1\text{mm}$  to match the DKI metric maps), and the number of slices should be changed to 43 without interpolation. **b.** The canvas size should then be adjusted to  $256 \times 256$  due to the difference in FOV. **c.** ROI was semi-automatically delineated in enhanced T1-FLAIR, **d.** and finally copied to the DKI metric maps.

**Supplementary Table S1: Detailed information for glioma patients**

| Category                        | Number | Age (years)   |
|---------------------------------|--------|---------------|
| <b>Overall</b>                  | 74     | 41.36 ± 14.01 |
| <b>Gender</b>                   |        |               |
| Male                            | 44     | 41.68 ± 12.59 |
| Female                          | 30     | 40.90 ± 16.08 |
| <b>Primary or recurrent</b>     |        |               |
| Primary glioma                  | 67     | 40.93 ± 14.35 |
| Recurrent glioma                | 7      | 45.57 ± 10.05 |
| <b>Tumor excision or biopsy</b> |        |               |
| Resection                       | 74     | 41.36 ± 14.01 |
| Biopsy                          | 0      |               |
| <b>Grade</b>                    |        |               |
| LGG                             | 34     | 35.97 ± 15.17 |
| HGG                             | 40     | 45.95 ± 11.21 |
| WHO grade I glioma              | 3      | 18.33 ± 15.31 |
| Pilocytic astrocytoma           | 3      |               |
| WHO grade II glioma             | 31     | 37.68 ± 14.26 |
| Diffuse astrocytoma             | 25     |               |
| Oligodendroglioma               | 3      |               |
| Oligo-astrocytoma               | 3      |               |
| WHO grade III glioma            | 19     | 43.53 ± 9.84  |
| Anaplastic astrocytoma          | 16     |               |
| Gliomatosis cerebri             | 1      |               |
| Anaplastic oligodendroglioma    | 1      |               |
| Anaplastic oligo-astrocytoma    | 1      |               |
| WHO grade IV glioma             | 21     | 48.14 ± 12.14 |
| Glioblastoma                    | 21     |               |

HGG: high-grade glioma; LGG: low-grade glioma

**Supplementary Table S2: Descriptive statistics of tumor characteristics on routine MRI**

| Tumor characteristics            | Overall      | HGG          | LGG           | Grade I      | Grade II      | Grade III     | Grade IV     |
|----------------------------------|--------------|--------------|---------------|--------------|---------------|---------------|--------------|
| <b>Size/area(cm<sup>2</sup>)</b> |              |              |               |              |               |               |              |
| In the maximal tumor slice       | 16.74 ± 9.81 | 17.96 ± 8.88 | 15.30 ± 10.76 | 20.93 ± 6.15 | 14.76 ± 11.02 | 19.58 ± 12.09 | 16.50 ± 4.19 |
| In the solid region of the tumor | 10.71 ± 7.57 | 10.72 ± 6.89 | 10.70 ± 8.41  | 7.91 ± 6.23  | 10.97 ± 8.62  | 10.06 ± 7.31  | 11.32 ± 6.61 |
| <b>Intensity</b>                 |              |              |               |              |               |               |              |
| Homogeneous                      | 14           | 4            | 10            | 0            | 10            | 4             | 0            |
| Not homogeneous                  | 60           | 36           | 24            | 3            | 21            | 15            | 21           |
| <b>Enhancement</b>               |              |              |               |              |               |               |              |
| Obvious enhancement              | 37           | 29           | 8             | 2            | 6             | 9             | 20           |
| Mild enhancement                 | 15           | 8            | 7             | 1            | 6             | 7             | 1            |
| No enhancement                   | 22           | 3            | 19            | 0            | 19            | 3             | 0            |
| <b>Edge</b>                      |              |              |               |              |               |               |              |
| Clear                            | 39           | 12           | 27            | 3            | 24            | 6             | 6            |
| Not clear                        | 35           | 28           | 7             | 0            | 7             | 13            | 15           |
| <b>Edema</b>                     |              |              |               |              |               |               |              |
| Obvious edema                    | 25           | 19           | 6             | 0            | 6             | 8             | 11           |
| Mild edema                       | 28           | 16           | 12            | 0            | 12            | 7             | 9            |
| No edema                         | 21           | 5            | 16            | 3            | 13            | 4             | 1            |
| <b>Legion number</b>             |              |              |               |              |               |               |              |
| Multiple                         | 16           | 13           | 3             | 0            | 3             | 4             | 9            |
| Single                           | 58           | 27           | 31            | 3            | 28            | 15            | 12           |

HGG: high-grade glioma; LGG: low-grade glioma

**Supplementary Table S3: Ki-67 expression in gliomas of different grades**

| Grade             | Number | Ki-67(%)        |
|-------------------|--------|-----------------|
| Overall           | 66     | 15.091 ± 16.527 |
| LGGs              | 31     | 6.677 ± 7.735   |
| HGGs              | 35     | 22.543 ± 18.646 |
| Grade I gliomas   | 2      | 1.500 ± 0.707   |
| Grade II gliomas  | 29     | 7.035 ± 7.876   |
| Grade III gliomas | 16     | 16.625 ± 11.960 |
| Grade IV gliomas  | 19     | 27.526 ± 21.912 |

Note: Data are presented as the mean and standard deviation.  
LGGs: low-grade gliomas; HGGs: high-grade gliomas.

**Supplementary Table S4: Comparisons of the kurtosis and conventional diffusion metrics in the grading of astrocytic tumors**

| Grade     | N  | MK            | Ka            | Kr            | MD            | FA            | ADC           |
|-----------|----|---------------|---------------|---------------|---------------|---------------|---------------|
| Total     | 66 |               |               |               |               |               |               |
| LGG       | 28 | 0.458 ± 0.078 | 0.590 ± 0.085 | 0.363 ± 0.074 | 2.060 ± 0.487 | 0.364 ± 0.127 | 1.921 ± 0.405 |
| HGG       | 38 | 0.676 ± 0.095 | 0.816 ± 0.132 | 0.552 ± 0.080 | 1.465 ± 0.297 | 0.424 ± 0.137 | 1.450 ± 0.303 |
| P         |    | < 0.001*      | < 0.001*      | < 0.001*      | < 0.001*      | 0.075         | < 0.001*      |
| Grade II  | 25 | 0.460 ± 0.082 | 0.591 ± 0.090 | 0.365 ± 0.078 | 2.034 ± 0.452 | 0.367 ± 0.127 | 1.913 ± 0.410 |
| Grade III | 17 | 0.621 ± 0.072 | 0.741 ± 0.112 | 0.507 ± 0.059 | 1.575 ± 0.312 | 0.444 ± 0.141 | 1.582 ± 0.331 |
| Grade IV  | 21 | 0.721 ± 0.089 | 0.877 ± 0.115 | 0.588 ± 0.077 | 1.376 ± 0.259 | 0.409 ± 0.136 | 1.344 ± 0.236 |
| P         |    | < 0.001*      | < 0.001*      | < 0.001*      | < 0.001*      | 0.187         | < 0.001*      |
| SNK       |    | IV > III > II | IV > III > II | IV > III > II | II > III, IV  | III, IV, II   | II > III > IV |

Note: All metrics are dimensionless, except for MD and ADC, with units of  $10^{-3}$  mm<sup>2</sup>/sec.

\* $P < 0.05$ .

In the results of SNK, “A > B” indicates that the metric value of A is significantly higher than that of B; “A, B” indicates that the metric value of A is higher than that of B, but without reaching significance.

HGG: high-grade glioma; LGG: low-grade glioma; MK: mean kurtosis; Ka: axial kurtosis; Kr: radial kurtosis; MD: mean diffusivity; FA: fractional anisotropy; ADC: apparent diffusion coefficient; SNK: Student-Newman-Keuls.

**Supplementary Table S5: Statistical values of all metrics for differentiating between HGGs and LGGs, grade II and grade III, and grade III and grade IV astrocytic tumors**

| Metrics                              | AUC   | P Value  | Cut-off value | Sensitivity | Specificity |
|--------------------------------------|-------|----------|---------------|-------------|-------------|
| <b>HGGs-LGGs</b>                     |       |          |               |             |             |
| MK                                   | 0.963 | < 0.001* | 0.553         | 94.70%      | 89.30%      |
| Ka                                   | 0.924 | < 0.001* | 0.655         | 89.50%      | 85.70%      |
| Kr                                   | 0.954 | < 0.001* | 0.443         | 92.10%      | 89.30%      |
| MD( $10^{-3}$ mm <sup>2</sup> /sec)  | 0.849 | < 0.001* | 1.655         | 81.60%      | 78.60%      |
| FA                                   | 0.605 | 0.142    | 0.322         | 81.60%      | 39.30%      |
| ADC( $10^{-3}$ mm <sup>2</sup> /sec) | 0.834 | < 0.001* | 1.627         | 78.90%      | 75.00%      |
| <b>Grade II–III</b>                  |       |          |               |             |             |
| MK                                   | 0.932 | < 0.001* | 0.553         | 94.10%      | 88.00%      |
| Ka                                   | 0.859 | < 0.001* | 0.655         | 82.40%      | 84.00%      |
| Kr                                   | 0.920 | < 0.001* | 0.436         | 94.10%      | 84.00%      |
| MD( $10^{-3}$ mm <sup>2</sup> /sec)  | 0.800 | < 0.001* | 1.627         | 76.50%      | 80.00%      |
| FA                                   | 0.638 | 0.115    | 0.287         | 94.10%      | 32.00%      |
| ADC( $10^{-3}$ mm <sup>2</sup> /sec) | 0.744 | 0.002    | 1.575         | 64.70%      | 76.00%      |
| <b>Grade III–IV</b>                  |       |          |               |             |             |
| MK                                   | 0.818 | < 0.001* | 0.667         | 85.70%      | 82.40%      |
| Ka                                   | 0.824 | < 0.001* | 0.825         | 76.20%      | 88.20%      |
| Kr                                   | 0.829 | < 0.001* | 0.538         | 81.00%      | 82.40%      |
| MD( $10^{-3}$ mm <sup>2</sup> /sec)  | 0.717 | 0.013*   | 1.409         | 66.70%      | 76.50%      |
| FA                                   | 0.577 | 0.418    | 0.334         | 38.10%      | 82.40%      |
| ADC( $10^{-3}$ mm <sup>2</sup> /sec) | 0.720 | 0.010*   | 1.400         | 76.20%      | 64.70%      |

Note: The cut-off value indicates the optimal threshold in the current study/sample size. All metrics are dimensionless, except for MD and ADC.

\* $P < 0.05$ .

AUC: area under the curve; HGGs: high-grade gliomas; LGGs: low-grade gliomas; MK: mean kurtosis; Ka: axial kurtosis; Kr: radial kurtosis; MD: mean diffusivity; FA: fractional anisotropy; ADC: apparent diffusion coefficient.

**Supplementary Table S6: Comparisons of AUCs among MK, MD and FA in astrocytic tumors**

| Comparison    | Statistic | MK-MD  | MK-ADC | MK-FA    | MD-ADC | MD-FA    | ADC-FA   |
|---------------|-----------|--------|--------|----------|--------|----------|----------|
| LGG-HGG       | P         | 0.008* | 0.001* | < 0.001* | 0.564  | < 0.001* | < 0.001* |
|               | Z         | 2.675  | 3.262  | 5.031    | 0.577  | 3.685    | 3.410    |
| Grades II–III | P         | 0.029* | 0.002* | < 0.001* | 0.191  | 0.097    | 0.257    |
|               | Z         | 2.185  | 3.036  | 3.399    | 1.308  | 1.662    | 1.135    |
| Grades III–IV | P         | 0.189  | 0.187  | 0.053    | 0.940  | 0.293    | 0.278    |
|               | Z         | 1.314  | 1.320  | 1.934    | 0.075  | 1.052    | 1.085    |

Note:

\* $P < 0.05$ .

MK: mean kurtosis; MD: mean diffusivity; ADC: apparent diffusion coefficient; FA: fractional anisotropy; HGGs: high-grade gliomas; LGGs: low-grade gliomas.



**Supplementary Table S7: Stepwise multiple logistic regression analyses of metrics in the prediction of astrocytic tumor grades**

| Differentiation | Variable | Coefficient | OR (95% CI)           | P       | Variables not included in the model |
|-----------------|----------|-------------|-----------------------|---------|-------------------------------------|
| HGG-LGG         | MK       | 2.671       | 14.455 (4.106–50.885) | < 0.001 | MD, ADC, FA                         |
| Grades II–III   | MK       | 2.539       | 12.667 (2.919–54.970) | < 0.001 | MD, ADC, FA                         |
| Grades III–IV   | MK       | 1.542       | 4.674 (1.604–13.615)  | < 0.001 | MD, ADC, FA                         |

Note: The coefficient, OR, 95% CI and P indicate the corresponding values when MK increases by 0.1.

OR: odd ratio; CI: confidence interval; MK: mean kurtosis; MD: mean diffusivity; ADC: apparent diffusion coefficient; FA: fractional anisotropy; HGG: high-grade glioma; LGG: low-grade glioma.

**Supplementary Table S8: Correlations between Ki-67 and each metric for astrocytic tumors**

|       |          | MK       | Ka       | Kr       | MD       | FA    | ADC      |
|-------|----------|----------|----------|----------|----------|-------|----------|
| Ki-67 | <i>r</i> | 0.622    | 0.617    | 0.601    | −0.427   | 0.050 | −0.457   |
|       | <i>P</i> | < 0.001* | < 0.001* | < 0.001* | < 0.001* | 0.712 | < 0.001* |
|       | <i>N</i> | 58       | 58       | 58       | 58       | 58    | 58       |

Note:

\* $P < 0.05$ .

MK: mean kurtosis; Ka: axial kurtosis; Kr: radial kurtosis; MD: mean diffusivity; FA: fractional anisotropy; ADC: apparent diffusion coefficient.
